# Supplementary material for: Mode of Transmission Determines the Virulence of Black Queen Cell Virus in Adult Honey Bees, Posing a Future Threat to Bees and Apiculture
Source: Viruses. 2020 May 14;12(5):535. doi: 10.3390/v12050535 (PMC7290678; doi:10.3390/v12050535)
Supplement: Supplementary file 1 [file viruses-12-00535-s001.xlsx]

## Sheet: Mortality
Bee ID	Status	treatment	day of death	cage
1	1	C	2	1
2	1	C	4	1
3	0	C	10	1
4	0	C	10	1
5	0	C	10	1
6	0	C	10	1
7	0	C	10	1
8	0	C	10	1
9	0	C	10	1
10	0	C	10	1
11	0	C	10	1
12	0	C	10	1
13	0	C	10	1
14	0	C	10	1
15	1	C	6	2
16	0	C	10	2
17	0	C	10	2
18	0	C	10	2
19	0	C	10	2
20	0	C	10	2
21	0	C	10	2
22	0	C	10	2
23	0	C	10	2
24	0	C	10	2
25	0	C	10	2
26	0	C	10	2
27	0	C	10	2
28	0	C	10	2
29	0	C	10	2
30	0	C	10	2
31	0	C	10	2
32	0	C	10	2
33	0	C	10	2
34	0	C	10	2
35	0	C	10	2
36	0	C	10	2
37	1	C	4	3
38	0	C	10	3
39	0	C	10	3
40	0	C	10	3
41	0	C	10	3
42	0	C	10	3
43	0	C	10	3
44	0	C	10	3
45	0	C	10	3
46	0	C	10	3
47	0	C	10	3
48	0	C	10	3
49	0	C	10	3
50	0	C	10	3
51	0	C	10	3
52	0	C	10	3
53	0	C	10	3
54	0	C	10	3
55	0	C	10	3
56	0	C	10	3
57	0	C	10	3
58	0	C	10	4
59	0	C	10	4
60	0	C	10	4
61	0	C	10	4
62	0	C	10	4
63	0	C	10	4
64	0	C	10	4
65	0	C	10	4
66	0	C	10	4
67	0	C	10	4
68	0	C	10	4
69	0	C	10	4
70	0	C	10	4
71	0	C	10	4
72	0	C	10	4
73	0	C	10	4
74	0	C	10	4
75	0	C	10	4
76	0	C	10	4
77	0	C	10	4
78	0	C	10	4
1	0	BQCV-Feeding	10	5
2	0	BQCV-Feeding	10	5
3	0	BQCV-Feeding	10	5
4	0	BQCV-Feeding	10	5
5	0	BQCV-Feeding	10	5
6	0	BQCV-Feeding	10	5
7	0	BQCV-Feeding	10	5
8	0	BQCV-Feeding	10	5
9	0	BQCV-Feeding	10	5
10	0	BQCV-Feeding	10	5
11	0	BQCV-Feeding	10	5
12	0	BQCV-Feeding	10	5
13	0	BQCV-Feeding	10	5
14	0	BQCV-Feeding	10	5
15	0	BQCV-Feeding	10	5
16	0	BQCV-Feeding	10	5
17	0	BQCV-Feeding	10	5
18	0	BQCV-Feeding	10	5
19	0	BQCV-Feeding	10	5
20	0	BQCV-Feeding	10	5
21	0	BQCV-Feeding	10	5
22	0	BQCV-Feeding	10	6
23	0	BQCV-Feeding	10	6
24	0	BQCV-Feeding	10	6
25	0	BQCV-Feeding	10	6
26	0	BQCV-Feeding	10	6
27	0	BQCV-Feeding	10	6
28	0	BQCV-Feeding	10	6
29	0	BQCV-Feeding	10	6
30	0	BQCV-Feeding	10	6
31	0	BQCV-Feeding	10	6
32	0	BQCV-Feeding	10	6
33	0	BQCV-Feeding	10	6
34	0	BQCV-Feeding	10	6
35	0	BQCV-Feeding	10	6
36	0	BQCV-Feeding	10	6
37	0	BQCV-Feeding	10	6
38	0	BQCV-Feeding	10	6
39	0	BQCV-Feeding	10	6
40	0	BQCV-Feeding	10	6
41	0	BQCV-Feeding	10	6
42	0	BQCV-Feeding	10	6
43	0	BQCV-Feeding	10	6
44	0	BQCV-Feeding	10	6
45	1	BQCV-Feeding	6	7
46	1	BQCV-Feeding	9	7
47	0	BQCV-Feeding	10	7
48	0	BQCV-Feeding	10	7
49	0	BQCV-Feeding	10	7
50	0	BQCV-Feeding	10	7
51	0	BQCV-Feeding	10	7
52	0	BQCV-Feeding	10	7
53	0	BQCV-Feeding	10	7
54	0	BQCV-Feeding	10	7
55	0	BQCV-Feeding	10	7
56	0	BQCV-Feeding	10	7
57	0	BQCV-Feeding	10	7
58	0	BQCV-Feeding	10	7
59	0	BQCV-Feeding	10	7
60	0	BQCV-Feeding	10	7
61	0	BQCV-Feeding	10	7
62	1	BQCV-Feeding	2	8
63	1	BQCV-Feeding	3	8
64	0	BQCV-Feeding	10	8
65	0	BQCV-Feeding	10	8
66	0	BQCV-Feeding	10	8
67	0	BQCV-Feeding	10	8
68	0	BQCV-Feeding	10	8
69	0	BQCV-Feeding	10	8
70	0	BQCV-Feeding	10	8
71	0	BQCV-Feeding	10	8
72	0	BQCV-Feeding	10	8
73	0	BQCV-Feeding	10	8
74	0	BQCV-Feeding	10	8
75	0	BQCV-Feeding	10	8
76	0	BQCV-Feeding	10	8
77	0	BQCV-Feeding	10	8
78	0	BQCV-Feeding	10	8
79	0	BQCV-Feeding	10	8
80	0	BQCV-Feeding	10	8
81	0	BQCV-Feeding	10	8
82	0	BQCV-Feeding	10	8
1	1	BQCV-Injection	3	9
2	1	BQCV-Injection	5	9
3	1	BQCV-Injection	6	9
4	1	BQCV-Injection	7	9
5	1	BQCV-Injection	8	9
6	1	BQCV-Injection	8	9
7	1	BQCV-Injection	9	9
8	1	BQCV-Injection	9	9
9	1	BQCV-Injection	9	9
10	1	BQCV-Injection	10	9
11	1	BQCV-Injection	10	9
12	1	BQCV-Injection	10	9
13	0	BQCV-Injection	10	9
14	0	BQCV-Injection	10	9
15	0	BQCV-Injection	10	9
16	0	BQCV-Injection	10	9
17	0	BQCV-Injection	10	9
18	0	BQCV-Injection	10	9
19	0	BQCV-Injection	10	9
20	0	BQCV-Injection	10	9
21	0	BQCV-Injection	10	9
22	0	BQCV-Injection	10	9
23	1	BQCV-Injection	6	10
24	1	BQCV-Injection	7	10
25	1	BQCV-Injection	7	10
26	1	BQCV-Injection	7	10
27	1	BQCV-Injection	7	10
28	1	BQCV-Injection	9	10
29	1	BQCV-Injection	9	10
30	1	BQCV-Injection	9	10
31	1	BQCV-Injection	10	10
32	1	BQCV-Injection	10	10
33	1	BQCV-Injection	10	10
34	0	BQCV-Injection	10	10
35	0	BQCV-Injection	10	10
36	1	BQCV-Injection	2	11
37	1	BQCV-Injection	2	11
38	1	BQCV-Injection	3	11
39	1	BQCV-Injection	8	11
40	1	BQCV-Injection	9	11
41	1	BQCV-Injection	9	11
42	1	BQCV-Injection	9	11
43	1	BQCV-Injection	9	11
44	1	BQCV-Injection	10	11
45	1	BQCV-Injection	10	11
46	1	BQCV-Injection	10	11
47	0	BQCV-Injection	10	11
48	0	BQCV-Injection	10	11
49	0	BQCV-Injection	10	11
50	0	BQCV-Injection	10	11
51	0	BQCV-Injection	10	11
52	0	BQCV-Injection	10	11
53	1	BQCV-Injection	8	12
54	1	BQCV-Injection	8	12
55	1	BQCV-Injection	9	12
56	1	BQCV-Injection	9	12
57	1	BQCV-Injection	10	12
58	1	BQCV-Injection	10	12
59	1	BQCV-Injection	10	12
60	1	BQCV-Injection	10	12
61	0	BQCV-Injection	10	12
62	0	BQCV-Injection	10	12
63	0	BQCV-Injection	10	12
64	0	BQCV-Injection	10	12
65	0	BQCV-Injection	10	12
66	0	BQCV-Injection	10	12
67	0	BQCV-Injection	10	12
68	0	BQCV-Injection	10	12
69	0	BQCV-Injection	10	12
70	0	BQCV-Injection	10	12
71	0	BQCV-Injection	10	12
72	0	BQCV-Injection	10	12
	Code
	0=right censored
	1=died during experiment

## Sheet: Viral titre Ct values
Sample No.	Actin	ABPV	CBPV	DWV-A	DWV-B	SBPV	SBV	BQCV
	Ct
C1	28.06	N/A	N/A	N/A	30.06	N/A	N/A	36.42
C2	27.71	N/A	N/A	N/A	31.92	N/A	N/A	N/A
C3	27.42	N/A	N/A	N/A	39.38	N/A	N/A	N/A
C4	26.34	N/A	N/A	39.56	34.59	N/A	N/A	34.67
C5	25.6	N/A	N/A	N/A	N/A	N/A	N/A	36.34
C6	25.74	N/A	N/A	N/A	37.85	N/A	N/A	35.83
C7	26.21	N/A	N/A	N/A	31.52	N/A	N/A	36.43
C8	26.22	N/A	N/A	N/A	26.27	N/A	N/A	N/A
F1	26.05	N/A	N/A	N/A	N/A	N/A	N/A	33.125
F2	26.19	N/A	N/A	N/A	36.18	N/A	N/A	33.125
F3	26.79	N/A	N/A	N/A	34.89	N/A	N/A	32.79
F4	27.02	N/A	N/A	N/A	33.98	N/A	N/A	32.72
F5	26.5	N/A	N/A	N/A	33.05	N/A	N/A	32.295
F6	27.03	N/A	N/A	N/A	38.27	N/A	N/A	33.28
F7	25.48	N/A	N/A	N/A	39.55	N/A	N/A	33.705
F8	26.05	N/A	N/A	N/A	37.52	N/A	N/A	31.805
I1	26.79	N/A	N/A	24.19	39.94	N/A	N/A	17.27
I2	26.52	N/A	N/A	N/A	36.32	N/A	33.68	14.39
I3	25.52	N/A	N/A	N/A	N/A	N/A	34.87	14.855
I4	26.26	N/A	N/A	N/A	N/A	N/A	34.41	14.385
I5	25.83	N/A	N/A	N/A	N/A	N/A	36.95	16.405
I6	26.53	N/A	N/A	N/A	38.13	N/A	39.56	16.565
I7	26.14	N/A	N/A	N/A	N/A	N/A	33.64	15.465
I8	26.09	N/A	N/A	N/A	N/A	N/A	37.09	15.255
C=control				N/A, no signal to Ct = 40
F=feeding				Ct<35, low viral titre
I=injection				Ct<30, intermediate viral titre
				Ct<20, high viral titre

## Sheet: Gene expression Ct values
samples	Actin	Dicer-like	Argonuate 2	Tarbo2-like
	Ct
C1	25.0889	31.1532	30.1495	29.6925
C2	24.6294	31.8202	29.7568	29.4954
C3	24.6692	31.7557	29.6197	29.6075
C4	24.0845	31.1003	29.2479	29.3088
C5	22.6344	29.9422	28.2791	27.2881
C6	22.808	29.9767	28.1796	27.7163
F1	22.72	30.1619	28.0442	27.5484
F2	24.6035	32.0522	29.3489	28.7173
F3	23.8843	31.7343	29.4912	30.3151
F4	24.0042	31.7039	29.2569	29.4232
F5	24.1571	31.0676	28.8247	28.8378
F6	24.9809	31.5791	29.1629	28.6533
I1	23.202	29.1484	26.8493	29.3183
I2	24.183	30.051	28.4351	29.7813
I3	22.691	28.9836	25.9647	29.0588
I4	24.5817	29.7468	27.6068	29.5
I5	23.0512	28.4729	26.4742	29.4377
I6	23.7265	30.4083	27.4211	30.0432
C=control
F=feeding
I=injection
